# Supplementary material
Source: publisher figshare collection journal article supplement (https://sage.figshare.com/ndownloader/files/20804757)
Supplement: Supplementary file 1 [file 20804757]

## Sheet: Sheet1
ID	Group	Case	Age (Year)	Sex	Breed	Treatment with antibiotics	Diet	Weight (kg)	Disease phenotype (response to treatment)	Clinical score (CIBDAI)	Histopathological score	Average number of EUB crypt	Average number of EUB surface	Total EUB	Average number of Faecalibacterium surface	Average number of Faecalibacterium crypt	Total Faecalibacterium	Average number of Akkermansia surface	Average number of Akkermansia crypt	Total Akkermansia	Average number of E coli surface	Average number of E coli crypt	Total E coli	Average number of Helicobacter surface	Average number of Helicobacter crypts	Total Helicobacter	Epithelial Injury - Colon	Crypt Distention - Colon	Fibrosis - Colon	Lamina Propria Lymphocytes and plasma cells - Colon	Lamina Propria Eosinophils - Colon	Lamina Propria Neutrophils - Colon	Lamina Propria Macrophages - Colon	Goblet cells
Control	0	15	4	Spayed female	Dachshund	No	NA	9.8	Not applicable	0	0	137.124	58.1149	195.239	0.851047	0.0985124	0.949559	78.0225	6.06812	84.0906	0.264822	0	0.264822	143.674	85.7383	229.413	0	0	0	0	0	0	0	0
Control	0	21	13	Spayed female	Labrador Retriever	No	NA	31	Not applicable	0	0	52.7274	333.679	386.407	0.497585	0.15157	0.649155	0.187288	0.0800725	0.267361	0	0.0633609	0.0633609	0	27.3407	27.3407	0	0	0	0	0	0	0	0
Control	0	23	7	Intact male	Great Pyrenees	No	NA	32	Not applicable	0	0	0	174.576	174.576	0.163285	0.104793	0.268078	2.73178	0.0460145	2.77779	0.233992	0	0.233992	0	0	0	0	0	0	0	0	0	0	0
Control	0	24	2	Intact male	Yorkshire Terrier	No	NA	2.78	Not applicable	0	0	225.088	89.1706	314.259	0.0974235	0.1	0.197424	0.129237	20.0808	20.21	0.246245	0.104959	0.351204	70.6188	48.639	119.258	0	0	0	0	0	0	0	0
Control	0	25	1	Spayed female	Blue Lacy	No	NA	15.8	Not applicable	0	0	164.478	151.823	316.302	67.2045	11.5539	78.7584	17.0568	27.8446	44.9013	0.172332	0	0.172332	191.52	39.0469	230.567	0	0	0	0	0	0	0	0
Control	0	26	3	Spayed female	Blue Tick Hound	No	NA	23.6	Not applicable	0	0	113.514	284.873	398.387	2.16135	7.85157	10.0129	0.0275424	24.7196	24.7471	0.0403162	0	0.0403162	61.8191	25.6511	87.4702	0	0	0	0	0	0	0	0
Control	0	29	5	Neutered male	Jack Russell Terrier	No	NA	6	Not applicable	0	0	107.242	686.966	794.208	3.15926	0	3.15926	0.704237	0.293116	0.997353	0.185771	0.0358127	0.221583	30.2116	25.349	55.5606	0	0	0	0	0	0	0	0
Control	0	6	6	Intact female	Mixed breed	No	NA	28	Not applicable	0	0	3.69416	43.1957	46.8899	7.29291	0.315537	7.60845	1.48729	1.7442	3.23149	1.21067	0.195041	1.40571	5.859	3.4756	9.3346	0	0	0	0	0	0	0	0
Control	0	7	3	Female	Mixed breed	No	NA	24.3	Not applicable	0	0	0.493285	14.5531	15.0464	2.81562	0.135041	2.95066	0.167797	0	0.167797	1.49368	0.363361	1.85704	0.388006	1.0134	1.40141	0	0	0	0	0	0	0	0
Control	0	8	10	Male	Mixed breed	No	NA	25.8	Not applicable	0	0	34.8123	34.5222	69.3345	1.02238	0.202975	1.22536	2.1572	0.597464	2.75467	1.06838	0.580441	1.64882	4.6953	6.7309	11.4262	0	0	0	0	0	0	0	0
Control	0	31	2	Intact male	Dachshund	No	NA	9	Not applicable	0	0	32.0845	341.817	373.902	0.124316	0.0955372	0.219853	0.216525	0.816667	1.03319	0.188142	0.234435	0.422578	35.478	26.0375	61.5155	0	0	0	0	0	0	0	0
CIE	1	H258	2	Spayed female	German Shepherd	Yes, (stopped 30 d before sampling)	Hills Prescription Diet® i/d®	13.38	SR	9	1.5	0.162482	1021.99	1022.15	9.58937	0	9.58937	0.195339	0	0.195339	0.435573	0.215427	0.651	1.12123	0	1.12123	0	1	0	1	0	0	0	1
CIE	1	H345	9	Neutered male	Pekingese	No	Hills Prescription Diet® i/d®	6.6	SR	2	1.5	0.253139	248.144	248.397	0.117391	0.0727273	0.190119	0.0258475	0.0344203	0.0602677	0.381423	0.16989	0.551313	0.182172	0.2003	0.382472	0	0	1	1	0	0	0	1
CIE	1	H635	3	Neutered male	Siberian Husky	No	Nutrisca lamb	31.43	NA	4	2	0.166423	522.885	523.052	0.770209	0.0342149	0.804424	0.0923729	0	0.0923729	0.302767	0.293664	0.596431	0	0	0	0	0	0	1	1	0	0	0
CIE	1	H853	0.5	Intact male	German Shepherd	Yes (stopped 30 d before sampling)	Hills Prescription Diet® i/d®	25.62	FR	6	5	80.0757	122.663	202.738	4.97166	0	4.97166	0.059322	0	0.059322	0.920949	0.0939394	1.01489	7.38363	8.9267	16.3103	0	1	0	2	0	1	1	1
CIE	1	H1234	4	Neutered male	Mixed Breed	No	Purina HA hydrolized and Royal canin hypoallergenic	27.21	NA	5	3	0.0381022	272.049	272.087	0.131079	0.0983471	0.229426	0.00762712	0	0.00762712	0.464427	0.334711	0.799138	0	0	0	1	1	0	0	0	1	0	0
CIE	1	H786	9	Neutered male	Irish Setter	Yes (stopped 21 d before sampling)	Hills Prescription Diet® i/d®	24.94	NA	8	6	0.0475912	1307.56	1307.61	0.0935588	0.0763636	0.169922	0.0911017	0	0.0911017	0.381818	0.171074	0.552893	0.66564	0.378	1.04364	2	2	1	2	0	1	0	0
CIE	1	H469	2	Female	German Shepperd	No	Raw diet (ground turkey, chicken liver, peas, carrots)	27.66	NA	2	0.5	80.4546	6258.71	6339.16	48.0791	0	48.0791	0.161017	0	0.161017	0.890909	0.177961	1.06887	26.5608	3.0585	29.6193	0	0	0	1	0	0	0	1
CIE	1	H2269	8	Spayed female	Soft Coated Wheaten	No	Royal canin GI low fat	15	FR	4	2	0.28	73.5551	73.8351	0.69694	0.143471	0.840411	1.67288	0.285507	1.95839	10.9119	1.00689	11.9187	7.15559	0.1074	7.26299	1	0	0	1	0	0	0	1
CIE	1	H2295	9	Spayed female	Soft coated wheaten terrier	No	Royal canin GI low fat	14.01	FR	4	1.5	0.145401	47.4969	47.6423	0.425604	0.157025	0.582629	1.11653	0.856884	1.97341	4.06877	0.211295	4.28007	2.71912	0.0251	2.74422	0	1	0	1	0	0	0	0
CIE	1	H2452	6	Spayed female	Mixed breed	Yes (stopped 21 d before sampling)	Royal canin GI low fat	19.45	SR	5	5	5.73547	176.229	181.964	6.79436	0.0758678	6.87023	0.55	0.0804348	0.630435	1.18735	0.560606	1.74796	26.7496	4.4604	31.21	2	2	0	2	0	2	0	0
CIE	1	B13263	6	Intact Male	Havanese	No	Soy and boiled chicken soup	5.5	SR	6	2	2.47635	1118.28	1120.76	0.140902	0.242645	0.383546	0.460169	0	0.460169	166.032	0.515427	166.548	4.45851	0.0875	4.54601	0	0	0	2	0	0	0	0
CIE	1	B13271	9	Intact Female	English Bulldog	No	Hills z/d hypoallergenic	26.4	FR	3	5	0.107007	88.4023	88.5093	0.37343	0	0.37343	0	0	0	15.0502	0.0856749	15.1359	0.155429	0.0218	0.177229	1	0	1	2	0	1	0	0
CIE	1	B13314	6	Neutered Male	Spanish Water Dog	No	Grounded chicken and potatoes	21	AR	5	2	0.671825	201.51	202.182	0	0	0	0.525424	0	0.525424	2.88577	0	2.88577	0.0907618	0.1918	0.282562	0	0	0	1	1	0	0	1
CIE	1	B13328	3	Neutered Male	White shepherd	No	1/2 dog food and 1/2 meat	26.2	AR	6	2	13.552	542.477	556.029	8.68325	0	8.68325	0	0	0	0.488142	0.523967	1.01211	8.14603	7.2833	15.4293	1	0	0	0	1	0	0	0
CIE	1	B13799	2	Neutered Male	German Shepherd	No	Hills z/d hypoallergenic	36	FR	7	5	0.604088	129.296	129.9	1.01546	0.541818	1.55728	0.158051	0	0.158051	2.66364	0.44573	3.10937	0.0257699	0.1317	0.15747	1	1	2	1	0	0	0	2
CIE	1	B13815	2	Intact Male	border terrier	No	Hills z/d hypoallergenic	7.5	SR	7	1	1.15241	189.504	190.656	0.251691	0	0.251691	0.426695	0	0.426695	2.21225	0.0884298	2.30068	0.0857374	0.142	0.227737	0	0	0	1	0	0	0	0
CIE	1	B14085	7	Intact Male	rhodesian ridgeback	No	Royal canin GI low fat	43.4	AR	6	2	0.330365	14.6326	14.9629	0	0	0	0	0	0	0.9	0.905785	1.80579	0.251053	0.2731	0.524153	0	0	1	1	0	0	0	0
CIE	1	B14212	3	Intact Male	standard poodle	No	Royal canin sensitivity control	21.1	FR	4	5	0.218978	697.227	697.446	3.90934	0.15686	4.0662	0	0.328986	0.328986	0.181028	0.193388	0.374416	10.1574	0.0636	10.221	2	0	1	1	0	1	0	0
CIE	1	B14272	5	Intact Female	collie, longhaired	No	raw food (broiler, turkey, reindeer) + deer-potato dry food for 3 years	22.8	FR	2	1	0.431971	68.2857	68.7177	4.00403	0.780826	4.78485	0	0	0	0.296443	0.726997	1.02344	0.135656	0.2895	0.425156	0	0	0	1	0	0	0	0
CIE	1	B15256	13	Spayed Female	parson russel terrier	No	Royal canin Annalergenic dry dog food	6.7	FR	2	5	1.49766	80.8603	82.3579	25.6407	0.0995041	25.7402	0	0	0	0.412648	0.667493	1.08014	0.140681	0.0505	0.191181	2	0	1	1	0	1	0	0
CIE	1	B15376	3	Spayed Female	Mixed breed	No	Hills z/d hypoallergenic	29.8	SR	6	6	0.106715	91.7446	91.8513	2.87005	0	2.87005	0.672034	0.436957	1.10899	0.56917	0.358953	0.928123	0.0343598	0.0279	0.0622598	0	0	3	1	1	1	0	0
CIE	1	B13996	2	Spayed Female	Dalmatian	No	Dry food and sausages	28.8	SR	4	8	0.773723	6.98086	7.75458	0.0560386	0.38595	0.441989	1.23305	0.280072	1.51312	0.0837945	0.435537	0.519332	0.0468395	0.037	0.0838395	2	1	0	3	2	0	0	0
SR: steroid responsive; NA: not available; FR: food responsive; AR: antibiotic responsive
